# Supplementary material for: Electrochemical characterization of the solvent-enhanced conductivity of poly(3,4-ethylenedioxythiophene) and its application in polymer solar cells
Source: Royal Society of Chemistry journal article supplement (doi:10.1039/b822729b), 2009-01-01
Supplement: b822729b.pdf [file b822729b.pdf]

## **Supporting Information**

**(J. Mater. Chem., paper no. b822729b)**

### **Electrochemical characterization of the solvent-enhanced conductivity of poly(3,4-ethylenedioxythiophene) and its application in polymer solar cells**

**Jen-Hsien Huang,<sup>a</sup> Dhananjay Kekuda,<sup>c</sup> Chih-Wei Chu<sup>\*cd</sup> and Kuo-Chuan Ho <sup>\*ab</sup>**

<sup>a</sup> Department of Chemical Engineering,

National Taiwan University, Taipei 10617, Taiwan

<sup>b</sup> Institute of Polymer Science and Engineering,

National Taiwan University, Taipei 10617, Taiwan

<sup>c</sup> Research Center for Applied Sciences, Academia Sinica, Taipei 11529, Taiwan

<sup>d</sup> Department of Photonics, National Chiao Tung University, Hsinchu 300, Taiwan

<sup>c,d</sup> Corresponding author: Tel: +886-2-2789-8000 ext 70.; Fax: +886-2-2782-6680.

E-mail: [gchu@gate.sinica.edu.tw](mailto:gchu@gate.sinica.edu.tw)

<sup>a,b</sup> Corresponding author: Tel: +886-2-2366-0739; Fax: +886-2-2362-3040.

E-mail: [kcho@ntu.edu.tw](mailto:kcho@ntu.edu.tw)

The amount of migration for  $\text{Li}^+$  and  $\text{ClO}_4^-$  is calculated from the results of molar flux (Figure 3). With the values of the amount of migration for  $\text{Li}^+$  and  $\text{ClO}_4^-$  we can estimate the  $x_R$  and  $x_O$  from Eq. 8 and Eq. 9 in the paper, respectively. Therefore, we can calculate the amount of accumulated ion pair per electron (Table 2) according to the values of  $x_R$  and  $x_O$ . The detail information about the amount of migration for  $\text{Li}^+$  and  $\text{ClO}_4^-$ ,  $x_R$  and  $x_O$  is shown in the following Table.

Table S1. The calculated amount of migration for  $\text{Li}^+$  and  $\text{ClO}_4^-$ ,  $x_R$  and  $x_O$  for the PEDOT stepped in 0.1 M  $\text{LiClO}_4/\text{ACN}$ .

| 0.3 to -0.9 V |                      |                         |           |              |
|---------------|----------------------|-------------------------|-----------|--------------|
| Cycle number  | $\text{Li}^+$ (nmol) | $\text{ClO}_4^-$ (nmol) | $x_{ri}$  | $(x_{ri}-1)$ |
| 1             | 7.85                 | -2.91                   | 0.729486  | -0.270511    |
| 2             | 7.28                 | -2.62                   | 0.734834  | -0.26517     |
| 3             | 7.12                 | -2.50                   | 0.740048  | -0.259950    |
| 4             | 7.06                 | -2.38                   | 0.747485  | -0.252511    |
| 5             | 7.00                 | -2.22                   | 0.758643  | -0.241362    |
| 10            | 6.93                 | -1.94                   | 0.781130  | -0.218873    |
| 50            | 6.83                 | -1.67                   | 0.802868  | -0.197131    |
| 100           | 5.33                 | -1.56                   | 0.773585  | -0.226420    |
| -0.9 to 0.3 V |                      |                         |           |              |
| Cycle number  | $\text{Li}^+$ (nmol) | $\text{ClO}_4^-$ (nmol) | $x_{oi}$  | $(x_{oi}+1)$ |
| 1             | -1.48                | 3.51                    | -0.296734 | 0.703266     |
| 2             | -1.98                | 3.17                    | -0.384466 | 0.615534     |
| 3             | -2.28                | 3.03                    | -0.429700 | 0.570299     |
| 4             | -2.40                | 2.98                    | -0.446919 | 0.553081     |
| 5             | -2.50                | 2.83                    | -0.469242 | 0.530758     |
| 10            | -2.72                | 2.41                    | -0.530763 | 0.469237     |
| 50            | -3.37                | 1.99                    | -0.628731 | 0.371269     |
| 100           | -2.73                | 1.66                    | -0.621867 | 0.378132     |

Table S2. The calculated amount of migration for  $\text{Li}^+$  and  $\text{ClO}_4^-$ ,  $x_R$  and  $x_O$  for the PEDOT stepped in 0.1 M  $\text{LiClO}_4/\text{DMF}$ .

| 0.3 to -0.9 V |                      |                         |           |              |
|---------------|----------------------|-------------------------|-----------|--------------|
| Cycle number  | $\text{Li}^+$ (nmol) | $\text{ClO}_4^-$ (nmol) | $x_{ri}$  | $(x_{ri}-1)$ |
| 1             | 5.219                | -1.07                   | 0.829994  | -0.170011    |
| 2             | 4.78                 | -1.09                   | 0.81431   | -0.185693    |
| 3             | 4.65                 | -1.09                   | 0.810105  | -0.189910    |
| 4             | 4.51                 | -1.18                   | 0.792619  | -0.207380    |
| 5             | 4.44                 | -1.12                   | 0.798561  | -0.201445    |
| 10            | 4.24                 | -1.12                   | 0.791045  | -0.208962    |
| 50            | 4.24                 | -1.12                   | 0.791045  | -0.208961    |
| 100           | 3.99                 | -1.04                   | 0.793241  | -0.206760    |
| -0.9 to 0.3 V |                      |                         |           |              |
| Cycle number  | $\text{Li}^+$ (nmol) | $\text{ClO}_4^-$ (nmol) | $x_{oi}$  | $(x_{oi}+1)$ |
| 1             | -1.77                | 2.33                    | -0.431990 | 0.568010     |
| 2             | -2.6                 | 1.97                    | -0.568927 | 0.431072     |
| 3             | -3.08                | 1.68                    | -0.647058 | 0.352941     |
| 4             | -3.25                | 1.58                    | -0.672877 | 0.327122     |
| 5             | -3.33                | 1.47                    | -0.693757 | 0.306251     |
| 10            | -3.47                | 1.33                    | -0.703932 | 0.296067     |
| 50            | -3.61                | 1.23                    | -0.745867 | 0.254132     |
| 100           | -3.57                | 1.02                    | -0.778129 | 0.221871     |

Table S3. The calculated amount of migration for  $\text{Li}^+$  and  $\text{ClO}_4^-$ ,  $x_R$  and  $x_O$  for the PEDOT stepped in 0.1 M  $\text{LiClO}_4/\text{EG}$ .

| 0.3 to -0.9 V |                      |                         |           |              |
|---------------|----------------------|-------------------------|-----------|--------------|
| Cycle number  | $\text{Li}^+$ (nmol) | $\text{ClO}_4^-$ (nmol) | $x_{ri}$  | $(x_{ri}-1)$ |
| 1             | 6.26                 | -5.52                   | 0.531545  | -0.468460    |
| 2             | 5.69                 | -5.12                   | 0.526364  | -0.473640    |
| 3             | 5.61                 | -4.84                   | 0.536842  | -0.463160    |
| 4             | 5.55                 | -4.67                   | 0.543053  | -0.456950    |
| 5             | 5.67                 | -4.47                   | 0.559172  | -0.440830    |
| 10            | 5.72                 | -3.98                   | 0.589691  | -0.410310    |
| 50            | 5.73                 | -3.54                   | 0.618123  | -0.381880    |
| 100           | 5.8                  | -2.91                   | 0.665901  | -0.334101    |
| -0.9 to 0.3 V |                      |                         |           |              |
| Cycle number  | $\text{Li}^+$ (nmol) | $\text{ClO}_4^-$ (nmol) | $x_{oi}$  | $(x_{oi}+1)$ |
| 1             | -2.14                | 7.86                    | -0.214110 | 0.786110     |
| 2             | -3.92                | 6.03                    | -0.393969 | 0.606031     |
| 3             | -4.53                | 5.26                    | -0.462717 | 0.537283     |
| 4             | -4.75                | 4.94                    | -0.490196 | 0.509804     |
| 5             | -5.05                | 4.64                    | -0.521155 | 0.478844     |
| 10            | -5.43                | 4.02                    | -0.574603 | 0.425397     |
| 50            | -5.56                | 3.49                    | -0.614019 | 0.385981     |
| 100           | -5.66                | 2.90                    | -0.662778 | 0.337222     |

Table S4. The calculated amount of migration for  $\text{Li}^+$  and  $\text{ClO}_4^-$ ,  $x_R$  and  $x_O$  for the PEDOT stepped in 0.1 M  $\text{LiClO}_4/\text{DMSO}$ .

| 0.3 to -0.9 V |                      |                         |           |              |
|---------------|----------------------|-------------------------|-----------|--------------|
| Cycle number  | $\text{Li}^+$ (nmol) | $\text{ClO}_4^-$ (nmol) | $x_{ri}$  | $(x_{ri}-1)$ |
| 1             | 9.11                 | -2.2                    | 0.805482  | -0.194523    |
| 2             | 8.68                 | -1.47                   | 0.855172  | -0.144830    |
| 3             | 8.31                 | -1.01                   | 0.891631  | -0.108372    |
| 4             | 8.1                  | -0.67                   | 0.923603  | -0.076411    |
| 5             | 7.88                 | -0.52                   | 0.938095  | -0.061910    |
| 10            | 7.75                 | -0.48                   | 0.941677  | -0.058322    |
| 50            | 7.69                 | -0.45                   | 0.944717  | -0.055281    |
| 100           | 7.61                 | -0.41                   | 0.948878  | -0.051120    |
| -0.9 to 0.3 V |                      |                         |           |              |
| Cycle number  | $\text{Li}^+$ (nmol) | $\text{ClO}_4^-$ (nmol) | $x_{oi}$  | $(x_{oi}+1)$ |
| 1             | -1.93                | 2.02                    | -0.488607 | 0.511392     |
| 2             | -2.73                | 1.05                    | -0.722222 | 0.277778     |
| 3             | -2.79                | 0.62                    | -0.818181 | 0.181818     |
| 4             | -2.71                | 0.31                    | -0.900332 | 0.099668     |
| 5             | -3.43                | 0.27                    | -0.927095 | 0.072905     |
| 10            | -3.46                | 0.25                    | -0.932677 | 0.067323     |
| 50            | -3.43                | 0.22                    | -0.939717 | 0.060283     |
| 100           | -3.38                | 0.19                    | -0.946878 | 0.053122     |
